# Supplementary material
Source: PubMed Central journal article supplement (PMC2481375)
Supplement: 0802361105_0802361105SI.pdf [file 0802361105_0802361105SI.pdf]

# Supporting Information

Ma et al. 10.1073/pnas.0802361105

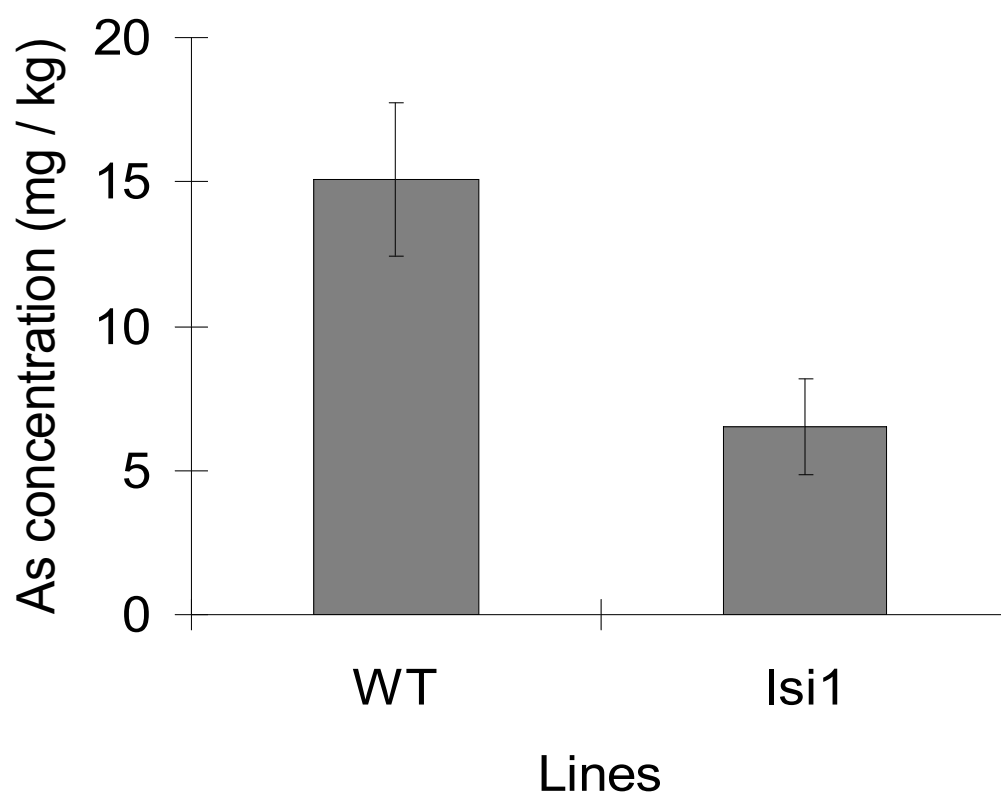

**Fig. S1.** Short-term As uptake by the wild-type rice (cv. Oochikara) and *Isi1* mutant. Roots of 15-day-old seedlings were exposed to 5  $\mu$ M As(III). After 30 min, the roots were desorbed with ice-cold 1 mM  $\text{KH}_2\text{PO}_4$ , 0.5 mM  $\text{Ca}(\text{NO}_3)_2$ , and 5 mM MES (pH 5.6) for 10 min. The As concentrations in the roots were determined by ICP-MS. Data are means  $\pm$  SD ( $n = 4$ ).

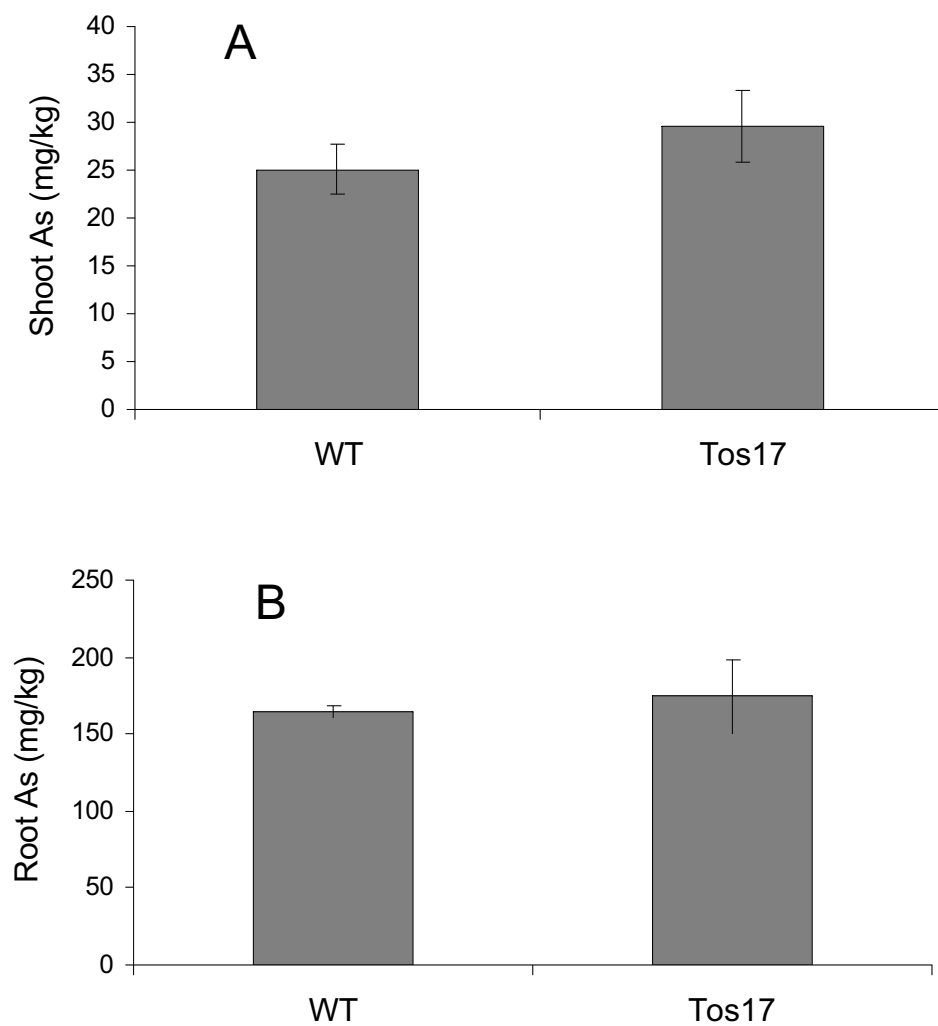

**Fig. S2.** Arsenic concentrations in the shoots (A) and roots (B) of the wild-type rice (cv. Nipponbare) and a Tos-17 insertion line for Lsi6. The seedlings were exposed to 2  $\mu$ M As(III) for 7 days. Data are means  $\pm$  SD ( $n = 3$ ).

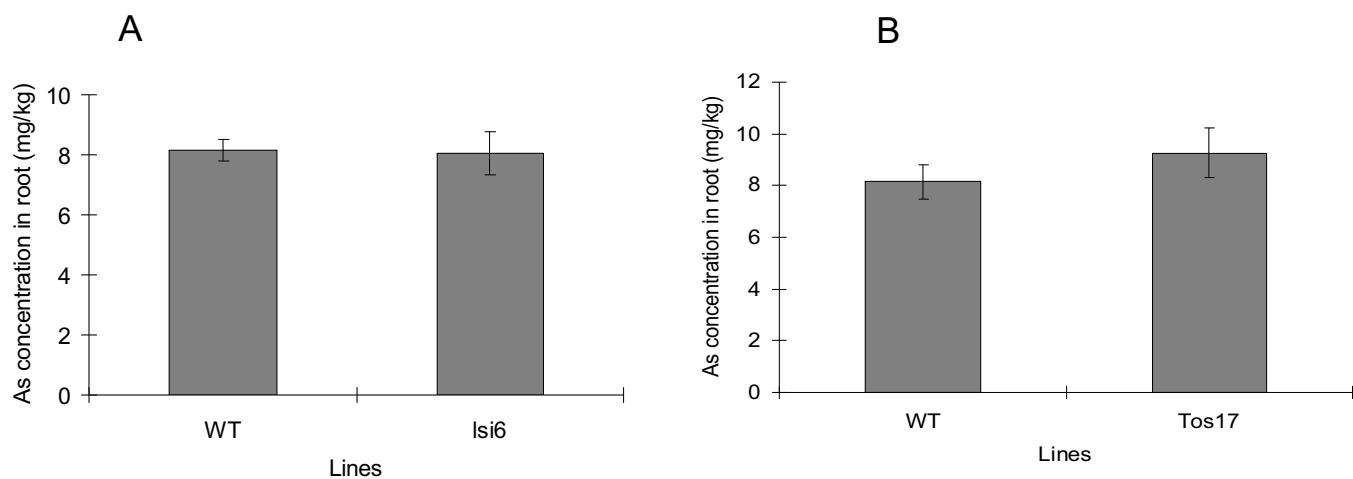

**Fig. S3.** Short-term As uptake by the wild-type rice [cv. Dongjin for *Isi6* (A) and Nipponbare for *Tos17* (B)] and two independent knockdown mutants. Roots of 20-day-old seedlings were exposed to 2  $\mu$ M As(III). After 30 min, the roots were desorbed with ice-cold 1 mM  $\text{KH}_2\text{PO}_4$ , 0.5 mM  $\text{Ca}(\text{NO}_3)_2$ , and 5 mM MES (pH 5.6) for 10 min. The As concentrations in the roots were determined by ICP-MS. Data are means  $\pm$  SD ( $n = 4$ ).

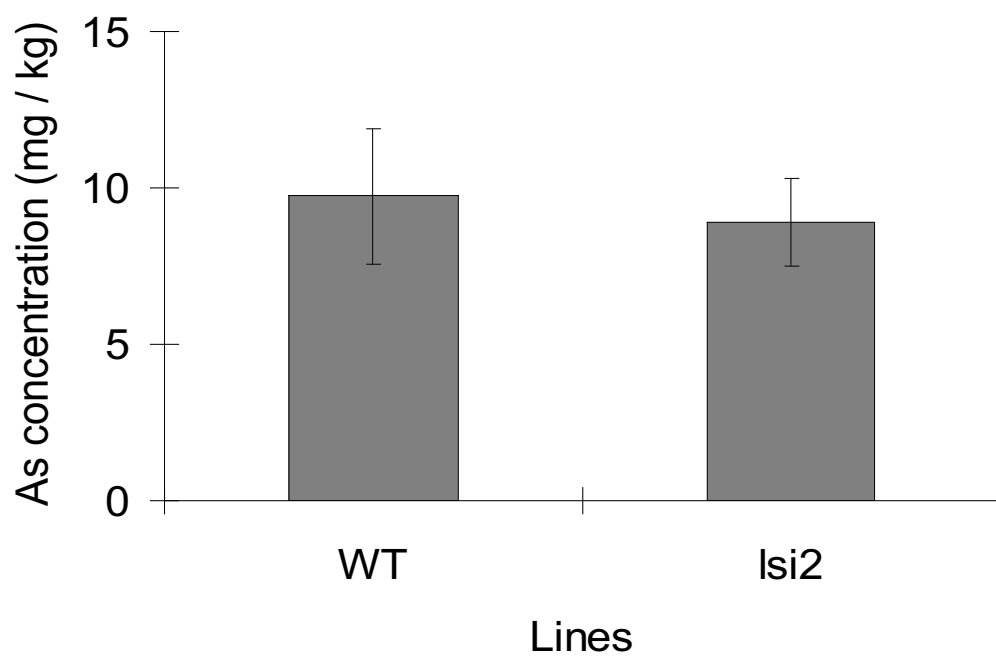

**Fig. S4.** Short-term As uptake by the wild-type rice (cv. T-65) and *Isi2* mutant. Roots of 15-day-old seedlings were exposed to 5  $\mu$ M As(III). After 30 min, the roots were desorbed with ice-cold 1 mM  $\text{KH}_2\text{PO}_4$ , 0.5 mM  $\text{Ca}(\text{NO}_3)_2$ , and 5 mM MES (pH 5.6) for 10 min. The As concentrations in the roots were determined by ICP-MS. Data are means  $\pm$  SD ( $n = 4$ ).

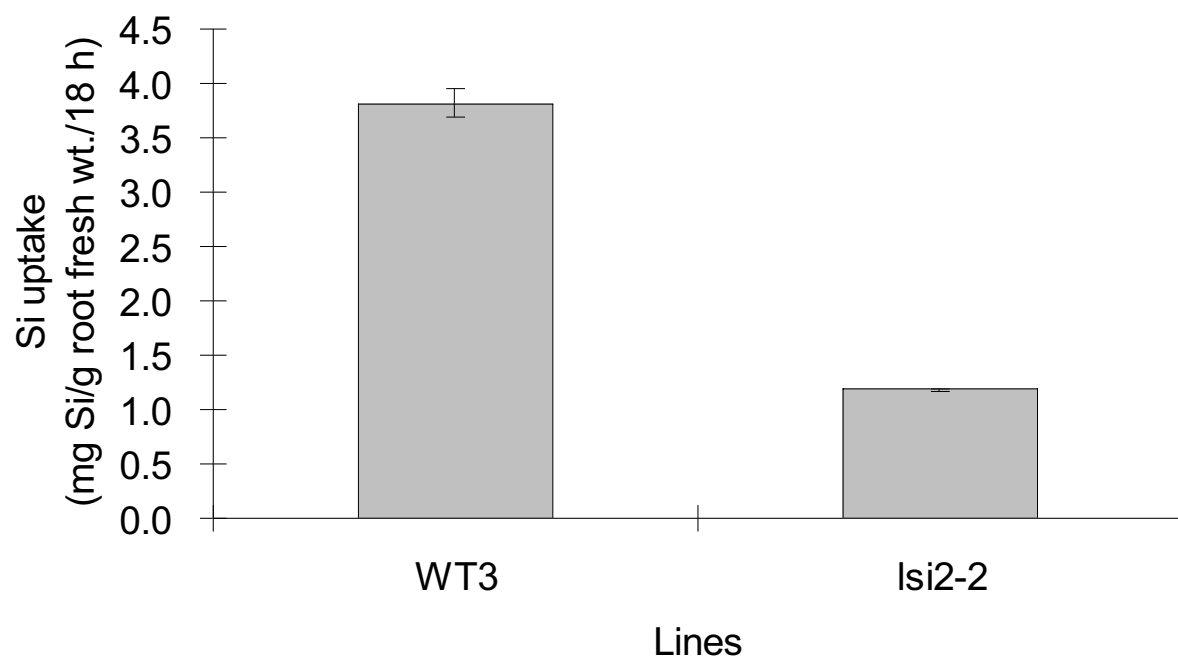

**Fig. S5.** Silicon uptake by the wild-type rice (cv. Koshihikari) and a novel mutant, *lsi2-2*. The seedlings were exposed to a nutrient solution containing 1 mM Si as silicic acid for 18 h. Data are means  $\pm$  SD ( $n = 3$ ).

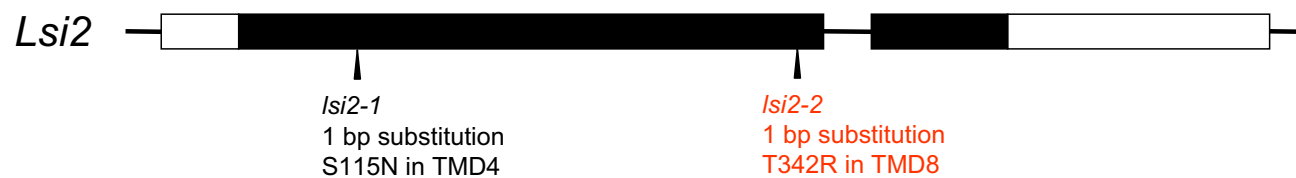

Fig. S6. Mutation of Lsi2 in the novel mutant *lsi2-2*.
